# Supplementary material for: Are Microplastics Toxic? A Review from Eco-Toxicity to Effects on the Gut Microbiota
Source: MDPI journal article supplement (doi:10.3390/metabo13060739), 2023-06-09
Supplement: s1 [file s1]

**Table S1.** Toxic effects of microplastic exposure to environmental organisms.

| Samples                           | Properties of MPs/NPs                                            | Toxicity                                                                                                                                                                                                                                                                                                                                           | Reference |
|-----------------------------------|------------------------------------------------------------------|----------------------------------------------------------------------------------------------------------------------------------------------------------------------------------------------------------------------------------------------------------------------------------------------------------------------------------------------------|-----------|
| Soil                              |                                                                  | A significant relationship between microplastic concentration and microbial activity                                                                                                                                                                                                                                                               | [50]      |
| Soil                              | Polypropylene microplastics (<180µm)                             | The microbiota activity of the polyacrylic and polyester group was significantly lower than that of the control group<br>The higher the concentration of microplastics, the higher the nutrient content in the solution of dissolved organic matter<br>Promoting enzyme activity and facilitates the accumulation of dissolved organic C, N, and P | [10]      |
| Mixed leaf litter                 | Polystyrene microplastics (10µm)                                 | Causes detritivore mortality, but does not affect growth<br>The decomposition of leaf litter decreases with increasing microplastic concentration (more pronounced in the presence of harmful substances)<br>Microbially mediated decomposition decreases with increasing microplastic concentration                                               | [51]      |
| Freshwater ecosystem              | microplastics                                                    | Significant reduction in root length of duckweed and biomass of Phytoplankton<br>The abundance of New Zealand mud snails ( <i>Potamopyrgus antipodarum</i> ) increased                                                                                                                                                                             | [52]      |
| Soil                              | Plastic film residue                                             | PAE concentrations increased with increasing plastic film residues<br>The soil microbial carbon and nitrogen, enzyme activities, and microbial diversity decreased significantly                                                                                                                                                                   | [53]      |
| Cress ( <i>Lepidium sativum</i> ) | Fluoro-Max Green Fluorescent Polymer nanospheres (50、500、4800nm) | The germination rate of cress decreased after 8h of microplastics treatment: from 78% to 1.7% after 4800nm microplastic treatment, and there was no difference in germination rate after 24h of exposure                                                                                                                                           | [54]      |

|                                                      |                                                           |                                                                                                                                                                                                                                                                                                                 |      |
|------------------------------------------------------|-----------------------------------------------------------|-----------------------------------------------------------------------------------------------------------------------------------------------------------------------------------------------------------------------------------------------------------------------------------------------------------------|------|
|                                                      |                                                           | Differences in root growth emerged after 24 h of exposure, and the differences were not significant after 48 and 72 h                                                                                                                                                                                           |      |
| Marine microalgae<br>( <i>Skeletonema costatum</i> ) | Polystyrene nanoplastics<br>(110nm)                       | Alteration of chloroplast fatty acid content affects the structure of photosynthetic complexes in microalgae, thus affecting microalgal growth                                                                                                                                                                  | [55] |
| Marine microalgae<br>( <i>Skeletonema costatum</i> ) | pure polyvinyl chloride micro-plastics(1mm)               | It has a significant inhibitory effect on the growth of microalgae, with a maximum inhibition rate of 39.7% after 96 hours of exposure<br>High concentration of mPVC reduces chlorophyll content and photosynthetic efficiency of algae                                                                         | [56] |
| Earthworm ( <i>Eisenia foetida</i> )                 | Polypropylene microplastics<br>(<150µm)                   | Accumulation in earthworm<br>Decreased growth rate and increased mortality<br>Increased GSH levels in the body in a dose-dependent manner, with an increasing trend of GSH levels over time                                                                                                                     | [57] |
| Earthworm ( <i>Eisenia fetida</i> )                  | Polystyrene nanoplastics (100nm and 1300nm)               | Accumulation in intestinal tissues and damage to intestinal cells<br>Significantly altered GSH and SOD levels<br>Caused DNA damage                                                                                                                                                                              | [58] |
| Wedge clam ( <i>Donax trunculus</i> )                | Polyethylene and polypropylene nanoplastics (100nm-400nm) | Gills are the first target organ for microplastic accumulation<br>Significant inhibition of total AChE activity in gills and digestive glands<br>Caused oxidative stress                                                                                                                                        | [59] |
| Oyster                                               | Polystyrene microplastics (2µm and 6µm)                   | Significantly higher consumption and uptake efficiency of microalgae in the exposed group and disturbed energy metabolism<br>Significantly lower oocyte number, diameter, and sperm velocity in the exposed group<br>Decreased larval production and development in the progeny of parents in the exposed group | [60] |

**Table S2.** Toxic effects of microplastic exposure to marine invertebrates and vertebrates.

| Samples                                   | Properties of microplastics used                        | Toxicity                                                                                                                                                                                                                                                                                                                                                                                                                                                                                                           | Reference |
|-------------------------------------------|---------------------------------------------------------|--------------------------------------------------------------------------------------------------------------------------------------------------------------------------------------------------------------------------------------------------------------------------------------------------------------------------------------------------------------------------------------------------------------------------------------------------------------------------------------------------------------------|-----------|
| Zebrafish ( <i>Danio rerio</i> )          | Polystyrene nanoplastics<br>(average diameter of 51 nm) | <ul style="list-style-type: none"> <li>Accumulated in the yolk sac 24 h after fertilization and migrates to the gastrointestinal tract, bile, liver, pancreas, heart, and brain during the whole development process</li> <li>Decreased accumulation in all organs during purification</li> <li>Did not result in significant death, malformation, or changes in mitochondrial bioenergetics, but decreased heart rate</li> <li>Altered larval behavior, as evidenced by insufficient swimming activity</li> </ul> | [21]      |
| Zebrafish ( <i>Dani rerio</i> )           | Polystyrene nanoplastics<br>(42nm)                      | <ul style="list-style-type: none"> <li>Significantly reduced GSH reductase activity in F0 generation brain, muscle, and testis, but did not affect mitochondrial functional parameters in heart and gonads</li> <li>Polystyrene accumulates in the yolk sac, gastrointestinal tract, liver, and pancreas in the F1 generation, and bradycardia occurs in the F1 generation</li> <li>Reduced GSH peroxidase activity and thiol levels in the F1 generation</li> </ul>                                               | [61]      |
| Seabirds                                  |                                                         | <ul style="list-style-type: none"> <li>The presence of anthropogenic particles in fecal precursors of both <i>Fulmarus glacialis</i> and <i>Uria lomvia</i></li> <li>It is estimated that fulmars and murre deposit 3.3-45.5 million artificial particles into the environment respectively during the breeding period</li> </ul>                                                                                                                                                                                  | [62]      |
| Thick-billed murre ( <i>Uria lomvia</i> ) |                                                         | <ul style="list-style-type: none"> <li>About 11% of the birds had at least one piece of plastic debris in their gastrointestinal tract</li> </ul>                                                                                                                                                                                                                                                                                                                                                                  | [63]      |

|                                             |                                                       |                                                                                                                                                                                                                                                                                                                                                                                                                                                                                                                                                                                                         |      |
|---------------------------------------------|-------------------------------------------------------|---------------------------------------------------------------------------------------------------------------------------------------------------------------------------------------------------------------------------------------------------------------------------------------------------------------------------------------------------------------------------------------------------------------------------------------------------------------------------------------------------------------------------------------------------------------------------------------------------------|------|
| Carp ( <i>Cyprinus carpio</i> )             | polyvinyl chloride microplastics                      | <ul style="list-style-type: none"> <li>Significantly inhibited the growth and weight gain of juvenile fish</li> <li>GSH peroxidase activity increases and then decreases with increasing exposure concentration</li> <li>A negative correlation between SOD and catalase activities <ul style="list-style-type: none"> <li>Significant reduction in malondialdehyde levels</li> </ul> </li> <li>Transcript levels of cytochrome P450 1A and GSH Stransferase increase and then decrease in the liver <ul style="list-style-type: none"> <li>Cytoplasmic vacuolation in the liver</li> </ul> </li> </ul> | [64] |
| Zebrafish ( <i>Danio rerio</i> )            | Polystyrene micro- and nanoplastics (5µm, 20µm, 70nm) | <ul style="list-style-type: none"> <li>After 7 d of exposure, microplastics with a diameter of 5 µm accumulated in the gill, liver, and intestine, and 20 µm microplastics accumulated only in the gill and intestine of the fish <ul style="list-style-type: none"> <li>Causes liver inflammation and lipid accumulation</li> </ul> </li> <li>Significantly elevated SOD and catalase activities, caused oxidative stress</li> <li>Changes in the metabolic profile of fish liver and disruption of fat and energy metabolism</li> </ul>                                                               | [23] |
| Marine medaka ( <i>Oryzias melastigma</i> ) | Polystyrene microplastics (10µm)                      | <ul style="list-style-type: none"> <li>Accumulation of microplastics in gills, intestine, and liver, leading to oxidative stress and histological changes</li> <li>Eased gonadal maturation in females and reduces female fecundity</li> <li>Significant negative regulation of hypothalamic-pituitary-gonad in female fish</li> <li>Delayed hatching time of offspring, reduced hatching rate, heart rate, and body length of offspring</li> </ul>                                                                                                                                                     | [65] |
| Zebrafish                                   | Polystyrene microplastics (5 µm)                      | <ul style="list-style-type: none"> <li>Inflammatory response and oxidative stress in the intestine</li> <li>Significant changes in the gut microbiome and tissue metabolic characteristics, mostly associated with oxidative stress,</li> </ul>                                                                                                                                                                                                                                                                                                                                                         | [66] |

---

|                                                                                 |                                                                       |                                                                                                                                                                                                                                                                                                                                                                                                                                                                                                                                                                                                                                                                                                                                                                                |      |
|---------------------------------------------------------------------------------|-----------------------------------------------------------------------|--------------------------------------------------------------------------------------------------------------------------------------------------------------------------------------------------------------------------------------------------------------------------------------------------------------------------------------------------------------------------------------------------------------------------------------------------------------------------------------------------------------------------------------------------------------------------------------------------------------------------------------------------------------------------------------------------------------------------------------------------------------------------------|------|
|                                                                                 |                                                                       | inflammation, and lipid metabolism                                                                                                                                                                                                                                                                                                                                                                                                                                                                                                                                                                                                                                                                                                                                             |      |
| Zebrafish ( <i>Danio rerio</i> ) and nematode ( <i>Caenorhabditis elegans</i> ) | PA, PE, PP, PVC and PS (70µm)                                         | <ul style="list-style-type: none"> <li>• Microplastic exposure for 10 d, no or low lethality of <i>D. rerio</i></li> <li>• Caused intestinal damage, including villi rupture and intestinal cell division</li> <li>• Exposure to 2d significantly inhibited nematode survival, body length, and fecundity</li> <li>• Decreasing calcium levels in the intestine and increasing GSH Stransferase expression</li> </ul>                                                                                                                                                                                                                                                                                                                                                          | [67] |
| Larval zebrafish ( <i>Danio rerio</i> )                                         | Polystyrene nanoplastics (468nm and 508nm)                            | <ul style="list-style-type: none"> <li>• After fertilization 4h begins exposure and first attaches to the embryonic chorion and then enters the larval gastrointestinal tract <ul style="list-style-type: none"> <li>• Reduced swimming speed and swimming distance</li> </ul> </li> <li>• Upregulation of inflammation and oxidative stress-related gene expression</li> </ul>                                                                                                                                                                                                                                                                                                                                                                                                | [68] |
| Larval zebrafish                                                                | Polystyrene microplastics (5µm and 50µm)                              | <ul style="list-style-type: none"> <li>• Altered abundance and diversity of the gut microbial community</li> <li>• Changes in metabolic profile, and differential metabolites involved in energy metabolism, glucolipid metabolism, inflammatory response, neurotoxic response, nucleic acid metabolism, and oxidative stress</li> <li>• Hydrogen peroxidase activity and GSH content were significantly reduced <ul style="list-style-type: none"> <li>• Changes in genes related to glycolysis and lipid metabolism</li> </ul> </li> <li>• Significantly increased degranulation of primary granules and release of neutrophil extracellular traps <ul style="list-style-type: none"> <li>• Interfere with the disease resistance of fish populations</li> </ul> </li> </ul> | [25] |
| Fathead minnow ( <i>pimephalespromelas</i> )                                    | Polystyrene nanoplastics (41nm), Polycarbonate nanoplastics (158.7nm) | <ul style="list-style-type: none"> <li>• Significantly increased degranulation of primary granules and release of neutrophil extracellular traps <ul style="list-style-type: none"> <li>• Interfere with the disease resistance of fish populations</li> </ul> </li> </ul>                                                                                                                                                                                                                                                                                                                                                                                                                                                                                                     | [72] |
| African catfish ( <i>Clarias gariepinus</i> )                                   | Polystyrene microplastics (<60µm)                                     | <ul style="list-style-type: none"> <li>• Significant increase in the degree of liver tissue changes</li> <li>• Significantly reduced transcript levels of tryptophan hydroxylase 2</li> </ul>                                                                                                                                                                                                                                                                                                                                                                                                                                                                                                                                                                                  | [73] |

---

in brain tissue

- Regulation of gill tissue changes, plasma cholesterol, HDL, total protein, albumin and globulin concentrations, liver glycogen reserves, and transcript levels of Fushitarazu factor 1, Gonadotropin-releasing hormone, and 11 $\beta$ -hydroxysteroid dehydrogenase type 2
- 

50. de Souza Machado, A.A.; Lau, C.W.; Till, J.; Kloas, W.; Lehmann, A.; Becker, R.; Rillig, M.C. Impacts of Microplastics on the Soil Biophysical Environment. *Environ Sci Technol* **2018**, *52*, 9656-9665, doi:10.1021/acs.est.8b02212.
10. Liu, H.; Yang, X.; Liu, G.; Liang, C.; Xue, S.; Chen, H.; Ritsema, C.J.; Geissen, V. Response of soil dissolved organic matter to microplastic addition in Chinese loess soil. *Chemosphere* **2017**, *185*, 907-917, doi:10.1016/j.chemosphere.2017.07.064.
51. López-Rojo, N.; Pérez, J.; Alonso, A.; Correa-Araneda, F.; Boyero, L. Microplastics have lethal and sublethal effects on stream invertebrates and affect stream ecosystem functioning. *Environ Pollut* **2020**, *259*, 113898, doi:10.1016/j.envpol.2019.113898.
52. Green, D.S.; Jefferson, M.; Boots, B.; Stone, L. All that glitters is litter? Ecological impacts of conventional versus biodegradable glitter in a freshwater habitat. *J Hazard Mater* **2021**, *402*, 124070, doi:10.1016/j.jhazmat.2020.124070.
53. Wang, J.; Lv, S.; Zhang, M.; Chen, G.; Zhu, T.; Zhang, S.; Teng, Y.; Christie, P.; Luo, Y. Effects of plastic film residues on occurrence of phthalates and microbial activity in soils. *Chemosphere* **2016**, *151*, 171-177, doi:10.1016/j.chemosphere.2016.02.076.
54. Bosker, T.; Bouwman, L.J.; Brun, N.R.; Behrens, P.; Vijver, M.G. Microplastics accumulate on pores in seed capsule and delay germination and root growth of the terrestrial vascular plant *Lepidium sativum*. *Chemosphere* **2019**, *226*, 774-781, doi:10.1016/j.chemosphere.2019.03.163.
55. Nolte, T.M.; Hartmann, N.B.; Kleijn, J.M.; Garnæs, J.; van de Meent, D.; Jan Hendriks, A.; Baun, A. The toxicity of plastic nanoparticles to green algae as influenced by surface modification, medium hardness and cellular adsorption. *Aquat Toxicol* **2017**, *183*, 11-20, doi:10.1016/j.aquatox.2016.12.005.
56. Zhang, C.; Chen, X.; Wang, J.; Tan, L. Toxic effects of microplastic on marine microalgae *Skeletonema costatum*: Interactions between microplastic

and algae. *Environ Pollut* **2017**, *220*, 1282-1288, doi:10.1016/j.envpol.2016.11.005.

57. Zhou, Y.; Liu, X.; Wang, J. Ecotoxicological effects of microplastics and cadmium on the earthworm *Eisenia foetida*. *J Hazard Mater* **2020**, *392*, 122273, doi:10.1016/j.jhazmat.2020.122273.
58. Jiang, X.; Chang, Y.; Zhang, T.; Qiao, Y.; Klobučar, G.; Li, M. Toxicological effects of polystyrene microplastics on earthworm (*Eisenia fetida*). *Environ Pollut* **2020**, *259*, 113896, doi:10.1016/j.envpol.2019.113896.
59. Tlili, S.; Jemai, D.; Brinis, S.; Regaya, I. Microplastics mixture exposure at environmentally relevant conditions induce oxidative stress and neurotoxicity in the wedge clam *Donax trunculus*. *Chemosphere* **2020**, *258*, 127344, doi:10.1016/j.chemosphere.2020.127344.
60. Sussarellu, R.; Suquet, M.; Thomas, Y.; Lambert, C.; Fabioux, C.; Pernet, M.E.J.; Le Goïc, N.; Quillien, V.; Mingant, C.; Epelboin, Y.; et al. Oyster reproduction is affected by exposure to polystyrene microplastics. *Proc Natl Acad Sci U S A* **2016**, *113*, 2430-2435, doi:10.1073/pnas.1519019113.
21. Pitt, J.A.; Kozal, J.S.; Jayasundara, N.; Massarsky, A.; Trevisan, R.; Geitner, N.; Wiesner, M.; Levin, E.D.; Di Giulio, R.T. Uptake, tissue distribution, and toxicity of polystyrene nanoparticles in developing zebrafish (*Danio rerio*). *Aquat Toxicol* **2018**, *194*, 185-194, doi:10.1016/j.aquatox.2017.11.017.
61. Pitt, J.A.; Trevisan, R.; Massarsky, A.; Kozal, J.S.; Levin, E.D.; Di Giulio, R.T. Maternal transfer of nanoplastics to offspring in zebrafish (*Danio rerio*): A case study with nanopolystyrene. *Sci Total Environ* **2018**, *643*, 324-334, doi:10.1016/j.scitotenv.2018.06.186.
62. Bourdages, M.P.T.; Provencher, J.F.; Baak, J.E.; Mallory, M.L.; Vermaire, J.C. Breeding seabirds as vectors of microplastics from sea to land: Evidence from colonies in Arctic Canada. *Sci Total Environ* **2021**, *764*, 142808, doi:10.1016/j.scitotenv.2020.142808.
63. Provencher, J.F.; Gaston, A.J.; Mallory, M.L.; O'Hara, P.D.; Gilchrist, H.G. Ingested plastic in a diving seabird, the thick-billed murre (*Uria lomvia*), in the eastern Canadian Arctic. *Mar Pollut Bull* **2010**, *60*, 1406-1411, doi:10.1016/j.marpolbul.2010.05.017.
64. Xia, X.; Sun, M.; Zhou, M.; Chang, Z.; Li, L. Polyvinyl chloride microplastics induce growth inhibition and oxidative stress in *Cyprinus carpio* var. larvae. *Sci Total Environ* **2020**, *716*, 136479, doi:10.1016/j.scitotenv.2019.136479.
23. Lu, Y.; Zhang, Y.; Deng, Y.; Jiang, W.; Zhao, Y.; Geng, J.; Ding, L.; Ren, H. Uptake and Accumulation of Polystyrene Microplastics in Zebrafish (*Danio rerio*) and Toxic Effects in Liver. *Environ Sci Technol* **2016**, *50*, 4054-4060, doi:10.1021/acs.est.6b00183.
65. Wang, J.; Li, Y.; Lu, L.; Zheng, M.; Zhang, X.; Tian, H.; Wang, W.; Ru, S. Polystyrene microplastics cause tissue damages, sex-specific reproductive disruption and transgenerational effects in marine medaka (*Oryzias melastigma*). *Environ Pollut* **2019**, *254*, 113024, doi:10.1016/j.envpol.2019.113024.
66. Qiao, R.; Sheng, C.; Lu, Y.; Zhang, Y.; Ren, H.; Lemos, B. Microplastics induce intestinal inflammation, oxidative stress, and disorders of metabolome and microbiome in zebrafish. *Sci Total Environ* **2019**, *662*, 246-253, doi:10.1016/j.scitotenv.2019.01.245.
67. Lei, L.; Wu, S.; Lu, S.; Liu, M.; Song, Y.; Fu, Z.; Shi, H.; Raley-Susman, K.M.; He, D. Microplastic particles cause intestinal damage and other adverse

effects in zebrafish *Danio rerio* and nematode *Caenorhabditis elegans*. *Sci Total Environ* **2018**, 619-620, 1-8, doi:10.1016/j.scitotenv.2017.11.103.

68. Qiang, L.; Cheng, J. Exposure to microplastics decreases swimming competence in larval zebrafish (*Danio rerio*). *Ecotoxicol Environ Saf* **2019**, 176, 226-233, doi:10.1016/j.ecoenv.2019.03.088.
25. Wan, Z.; Wang, C.; Zhou, J.; Shen, M.; Wang, X.; Fu, Z.; Jin, Y. Effects of polystyrene microplastics on the composition of the microbiome and metabolism in larval zebrafish. *Chemosphere* **2019**, 217, 646-658, doi:10.1016/j.chemosphere.2018.11.070.
72. Greven, A.-C.; Merk, T.; Karagöz, F.; Mohr, K.; Klapper, M.; Jovanović, B.; Palić, D. Polycarbonate and polystyrene nanoplastic particles act as stressors to the innate immune system of fathead minnow (*Pimephales promelas*). *Environ Toxicol Chem* **2016**, 35, 3093-3100, doi:10.1002/etc.3501.
73. Karami, A.; Romano, N.; Galloway, T.; Hamzah, H. Virgin microplastics cause toxicity and modulate the impacts of phenanthrene on biomarker responses in African catfish (*Clarias gariepinus*). *Environ Res* **2016**, 151, 58-70, doi:10.1016/j.envres.2016.07.024.
